# Supplementary material for: A complex of cobalamin with an organic peroxide
Source: Royal Society of Chemistry journal article supplement (doi:10.1039/d3nj03307d), 2023-01-01
Supplement: d3nj03307d1.pdf [file d3nj03307d1.pdf]

Supporting Information

**A complex of cobalamin with an organic peroxide**

Maria Lehene,<sup>a</sup> Cezara Zăgrean-Tuza,<sup>a</sup> Niculina Hădăde,<sup>a</sup> Andreea Aghion,<sup>a</sup> Raluca Şeptelean,<sup>a</sup> Stefania D. Iancu,<sup>b</sup> Adrian M.V. Brânzanic,<sup>c</sup> Radu Silaghi-Dumitrescu<sup>\*a</sup>

<sup>a</sup>Department of Chemistry, Babeş-Bolyai University, Str. Arany Janos Nr. 11, RO-400028 Cluj-Napoca, Romania.

<sup>b</sup>Faculty of Physics, Babeş-Bolyai University, Str. Kogalniceanu 1, RO-400084 Cluj-Napoca, Romania.

<sup>c</sup>Raluca Ripan Institute for Research in Chemistry, Babeş-Bolyai University, Fantanele 30, 400294, Cluj-Napoca, Romania.

Correspondence to radu.silaghi@ubbcluj.ro.

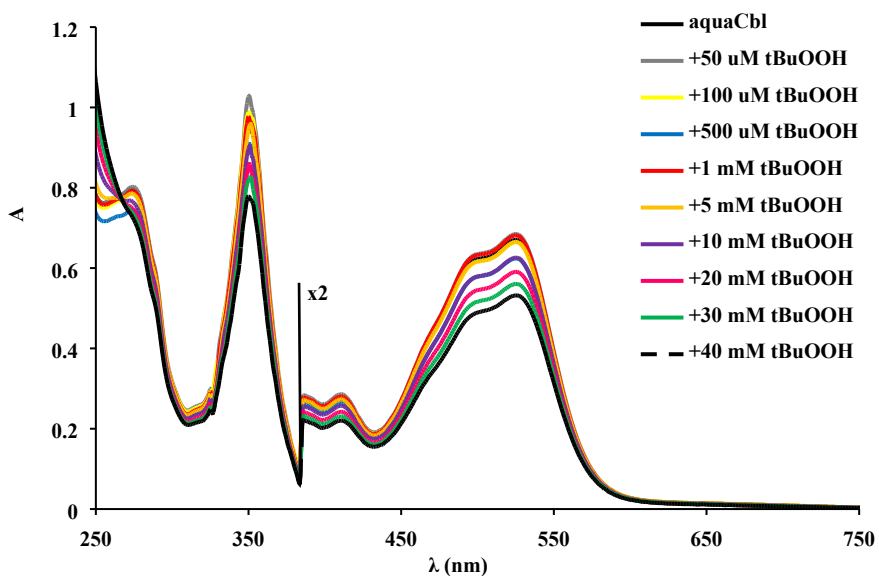

**Figure S1.** UV-vis spectra of 50 µM aquaCbl treated with at tBuOOH at pH 7, room temperature.

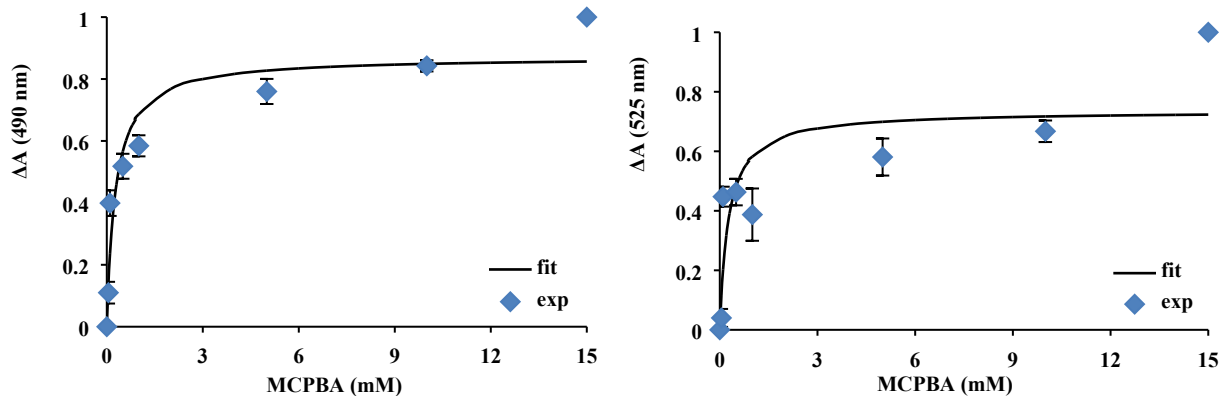

**Figure S2.** Titration curves for aquaCbl reacting with MCPBA at pH 7, monitored at 490 nm and 525 nm.

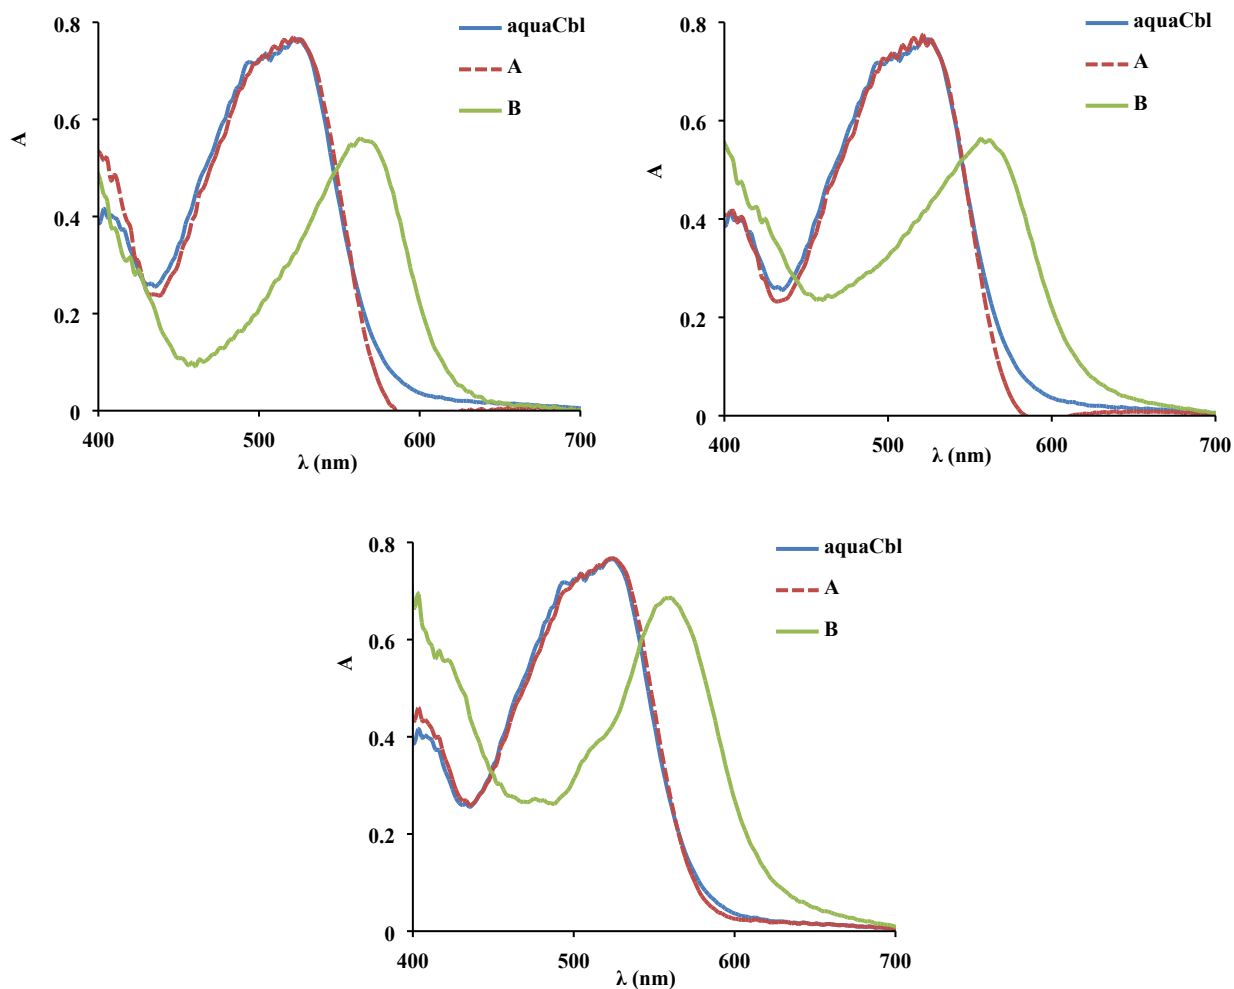

**Figure S3.** Representative spectra of species A and B at pH 7, room temperature, resulted from fitting of the stopped-flow data upon reaction of 0.3 mM aquaCbl with 25 mM MCPBA (upper left), 75 mM MCPBA (upper right) and 100 mM MCPBA (bottom).

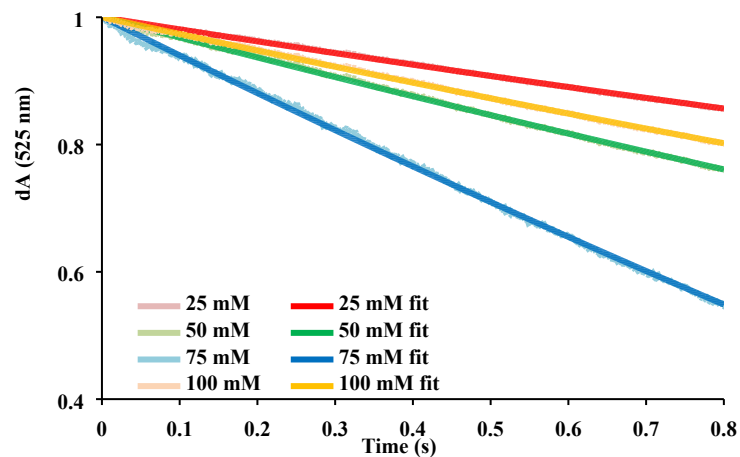

**Figure S4.** Absorbance time course from stopped-flow UV-vis experiments at varying MCPBA concentrations monitored at 525 nm.

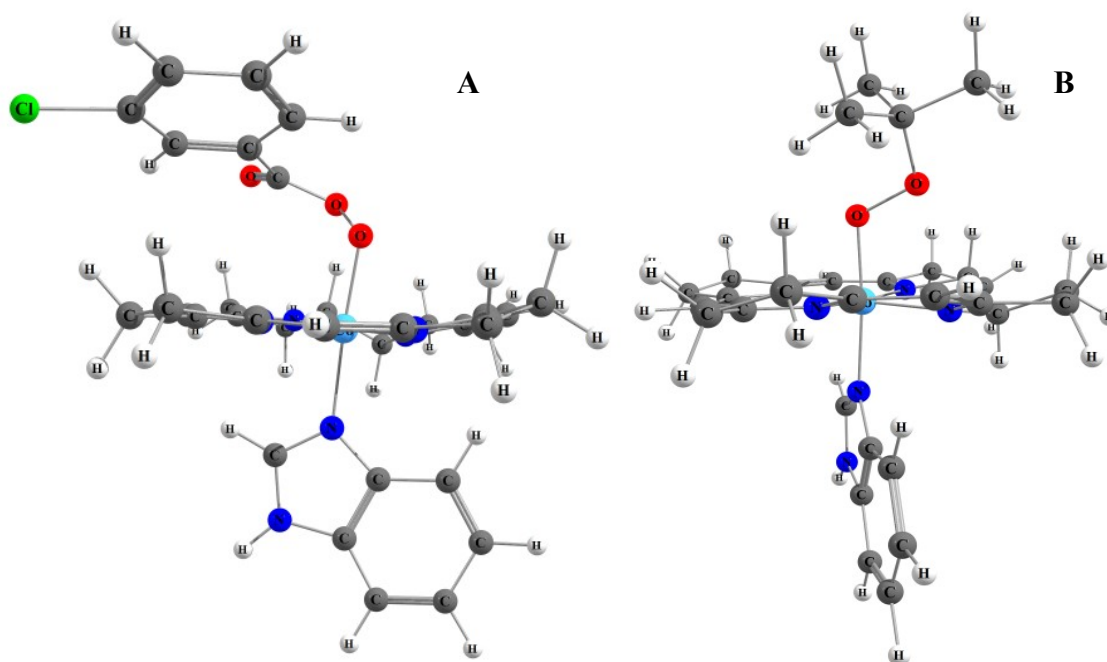

**Figure S5.** DFT-optimized geometries for Cbl-MCPBA (A) and Cbl-tBuOOH (B) complexes.

**Table S1.** DFT-derived data (key bond lengths in Å, and relative energies in kcal/mol, where applicable) of Cbl-MCPBA and Cbl-tBuOOH models.

| ligand              | dE  | Co-L | O-O  | O-C  | Co-DMBZ |
|---------------------|-----|------|------|------|---------|
| MCPBA, bound via Cl | 1.4 | 3.19 | 1.45 | 1.38 | 1.91    |
| MCPBA, bound via O  | 0.0 | 2.07 | 1.46 | 1.38 | 1.92    |
| MCPBA <sup>-</sup>  |     | 1.91 | 1.44 | 1.35 | 2.00    |
| tBuOOH              |     | 2.01 | 1.48 | 1.47 | 1.94    |
| tBuOO <sup>-</sup>  |     | 1.88 | 1.47 | 1.44 | 2.02    |

**Table S2.** TD-DFT-derived wavelengths (nm) and oscillator strengths (OS) for Cbl-MCPBA<sup>-</sup> and Cbl-tBuOO<sup>-</sup> models; the two most intense bands above 300 nm are reported.

| MCPBA |        | tBuOOH |        |
|-------|--------|--------|--------|
| nm    | OS     | nm     | OS     |
| 312   | 0.2217 | 311    | 0.2573 |
| 439   | 0.1247 | 444    | 0.1091 |

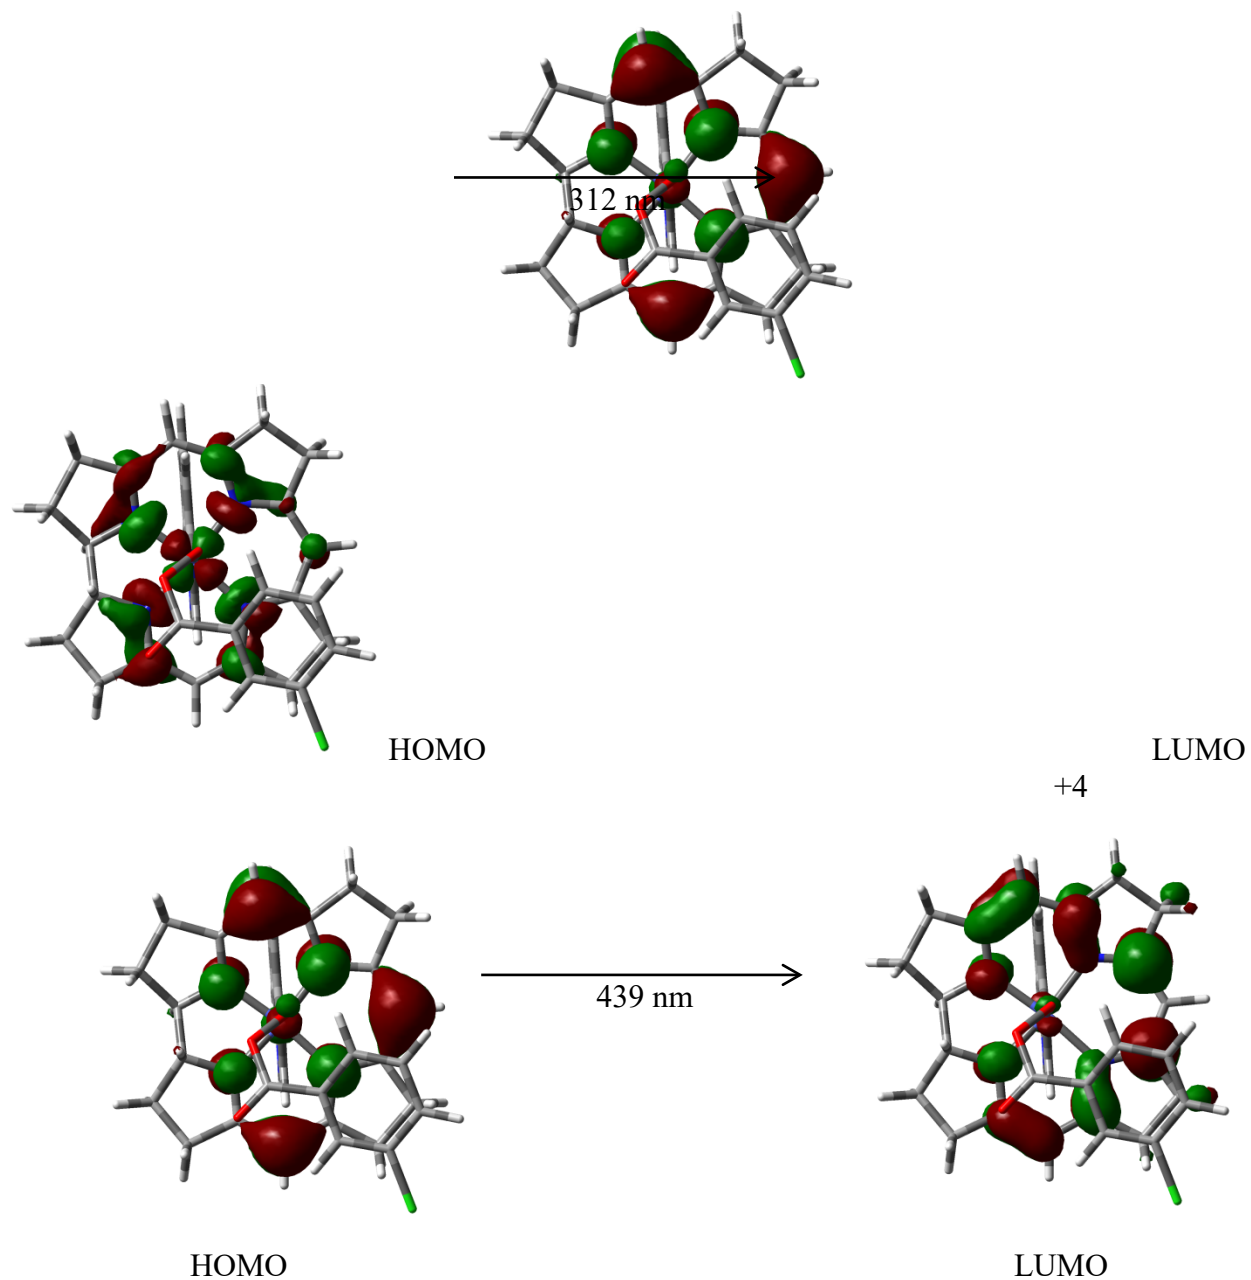

**Figure S6.** The main orbitals responsible for the main contributors to the two main bands in the TD-DFT spectra in MCPBA cf. B3PW91 calculations.

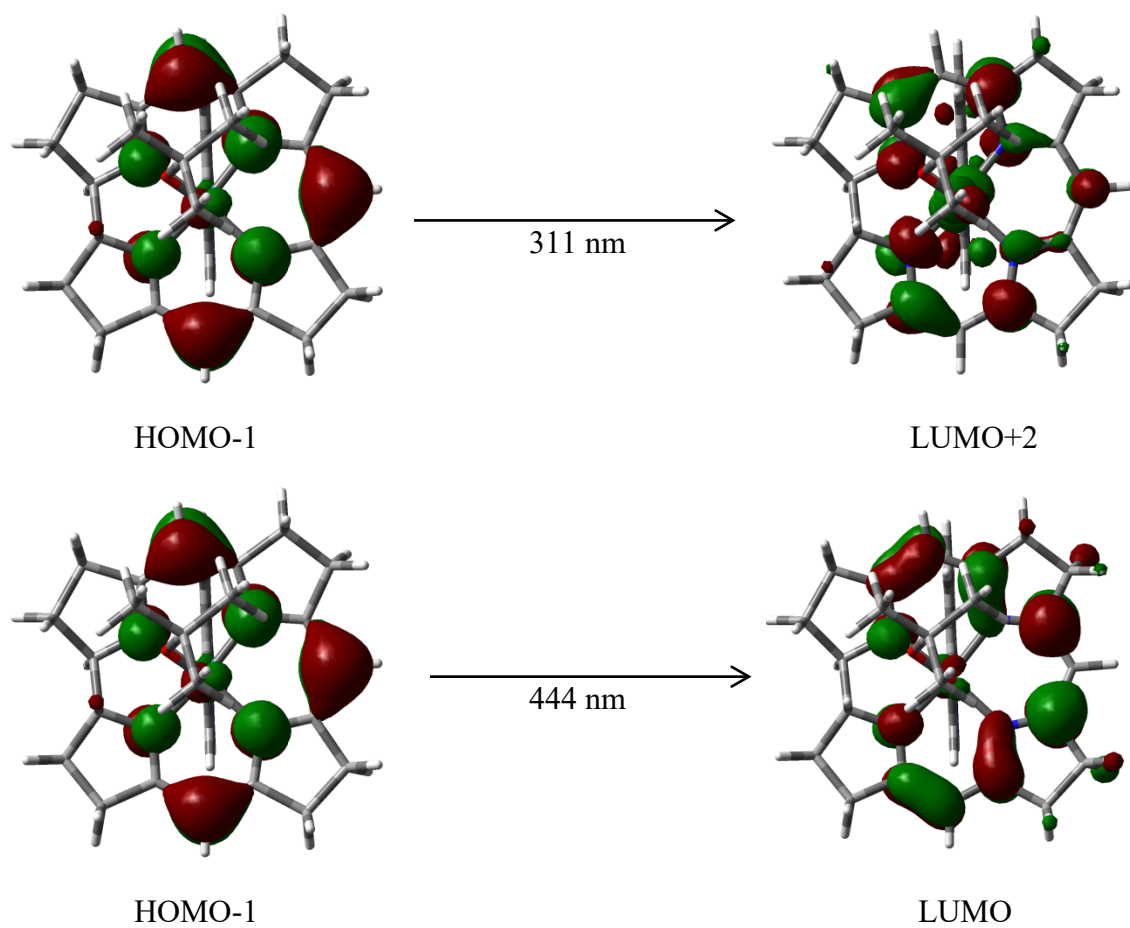

**Figure S7.** The main orbitals responsible for the main contributors to the two main bands in the TD-DFT spectra in tBuOOH cf. B3PW91 calculations.

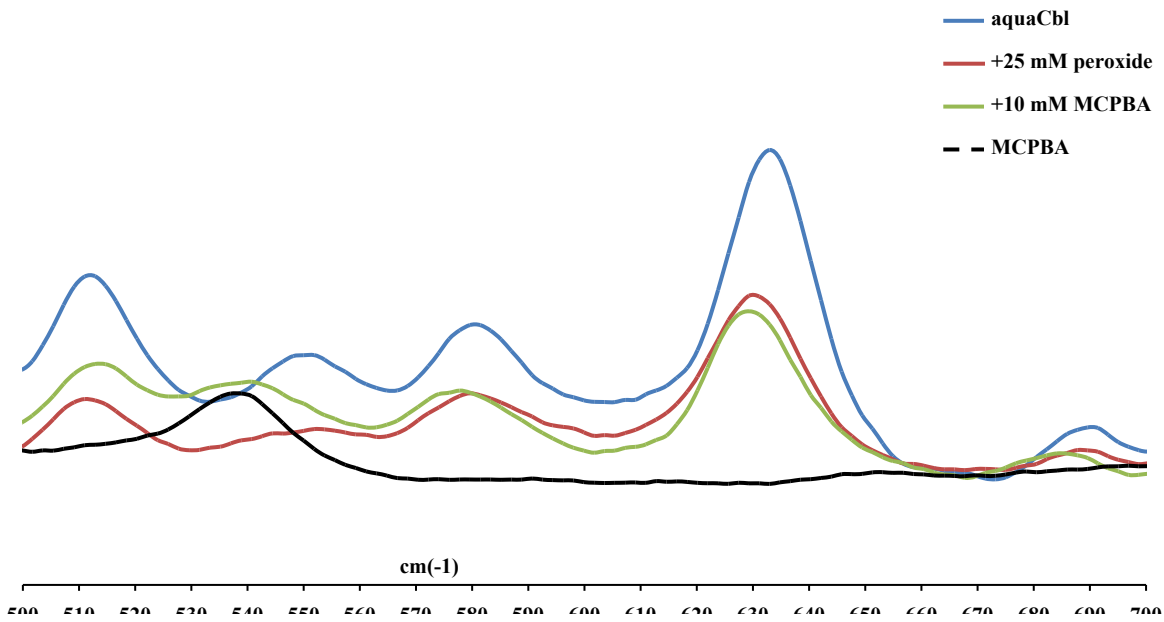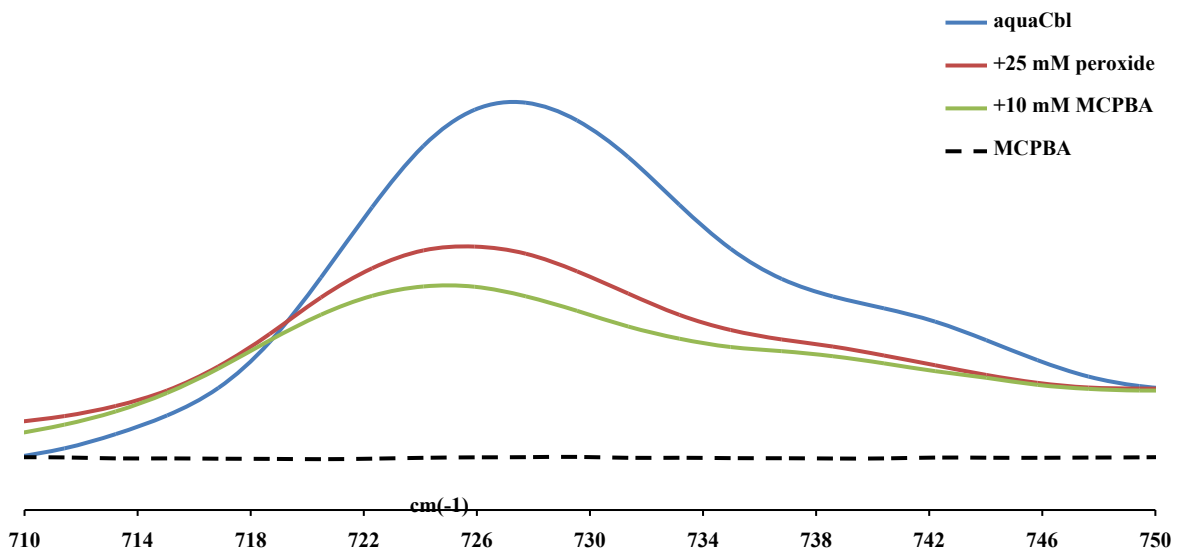

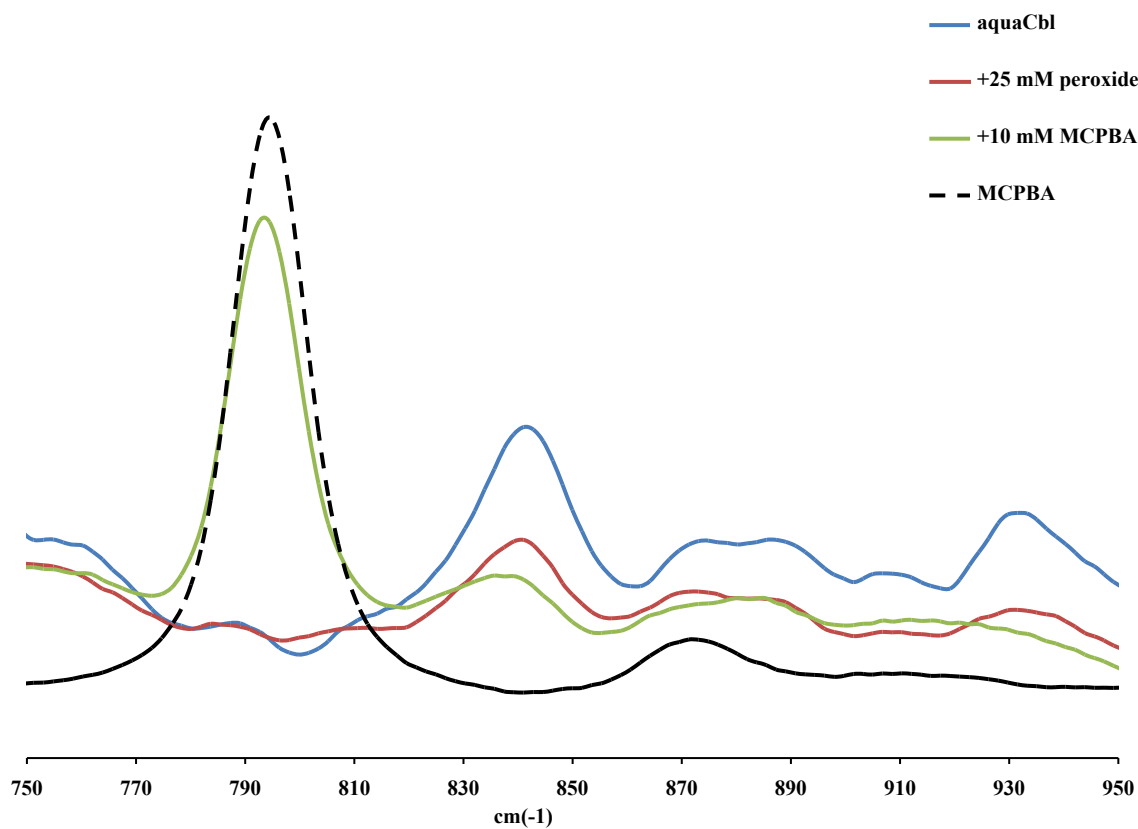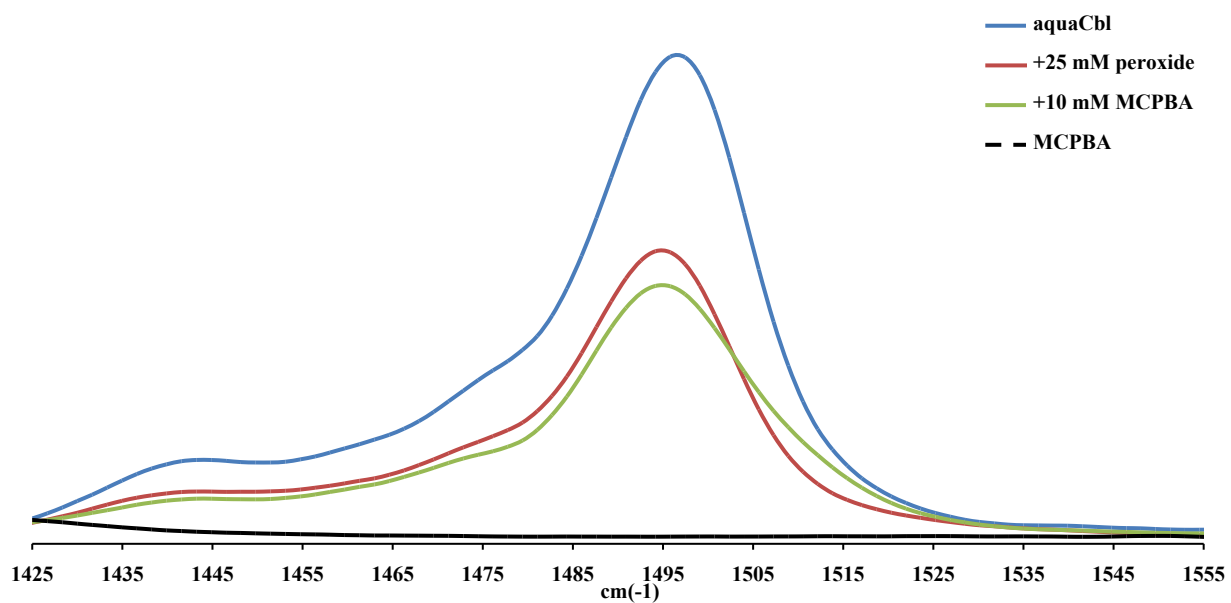

**Figure S8.** Details of resonance Raman spectra of Cbl in the presence or absence of hydrogen peroxide or MCPBA. Conditions: 1 mM aquaCbl, 25 mM H<sub>2</sub>O<sub>2</sub>, 10 mM MCPBA, 50 mM phosphate pH 7, 22°C.



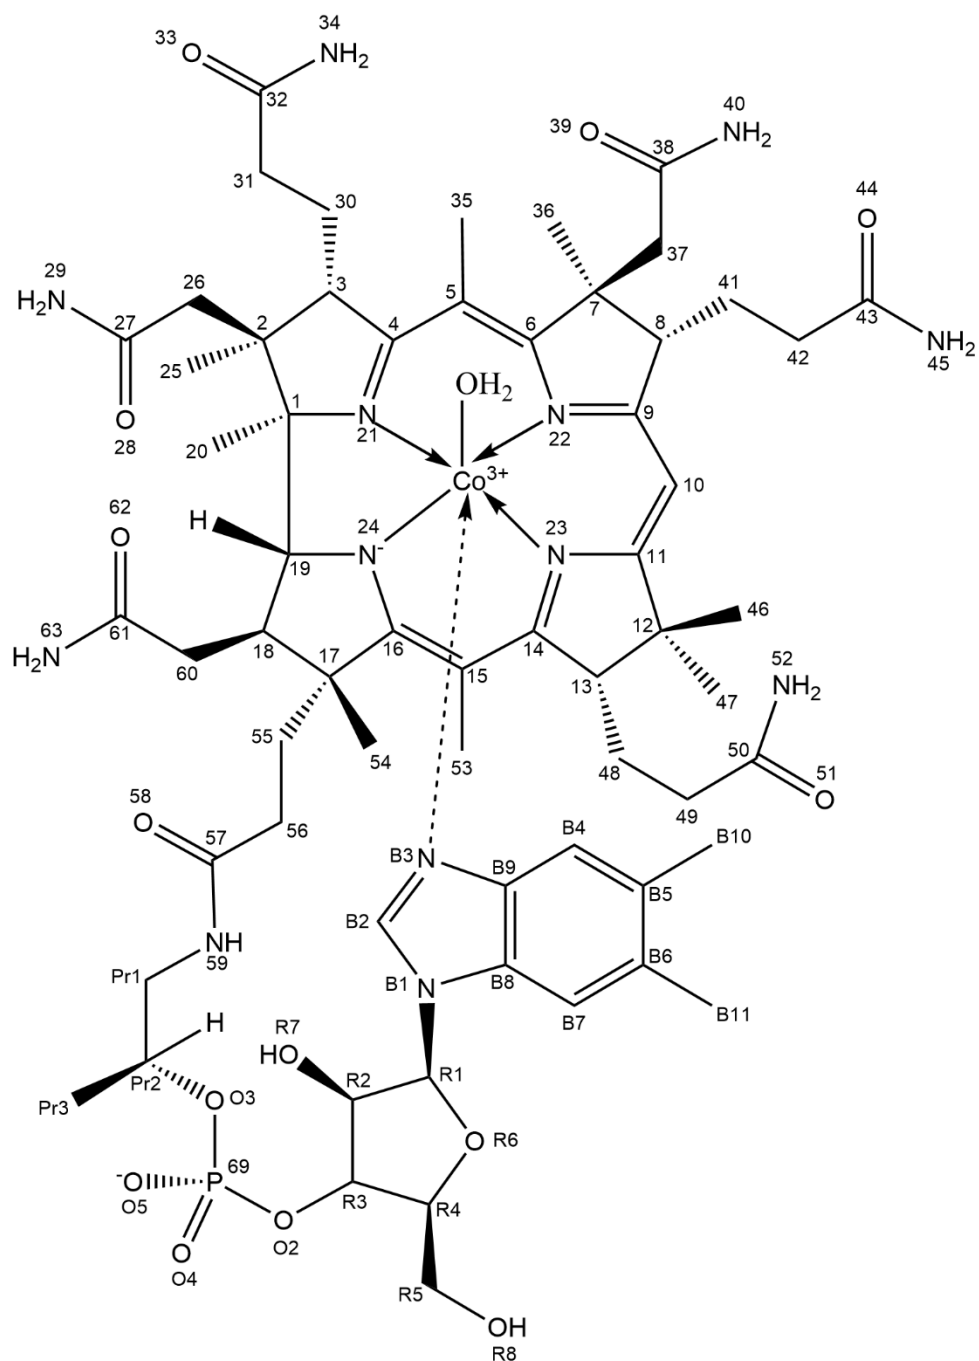

**Figure S9.** Cbl structure with atom numbering/labeling employed for <sup>1</sup>H-NMR assignments. Standard labels are used, including “B” for the dimethylimidazole atoms, “R” for the ribose atoms, and “Pr” for the side-chain propyl group; for all other atoms, the label includes the chemical symbol by default (e.g., B2, R1, C10). Protons are referred to by the name of the atoms to which they are connected to. Hydrogen atoms bound to carbon are not shown explicitly, except for cases where their stereochemistry needs to be emphasized.

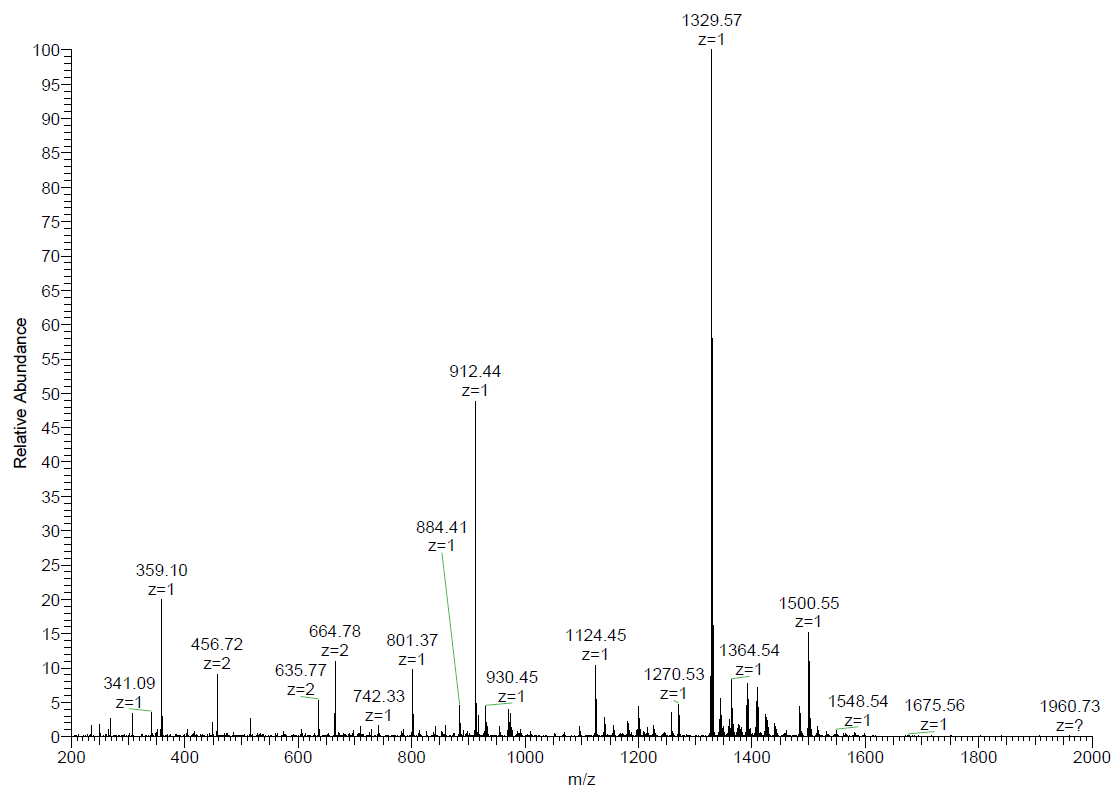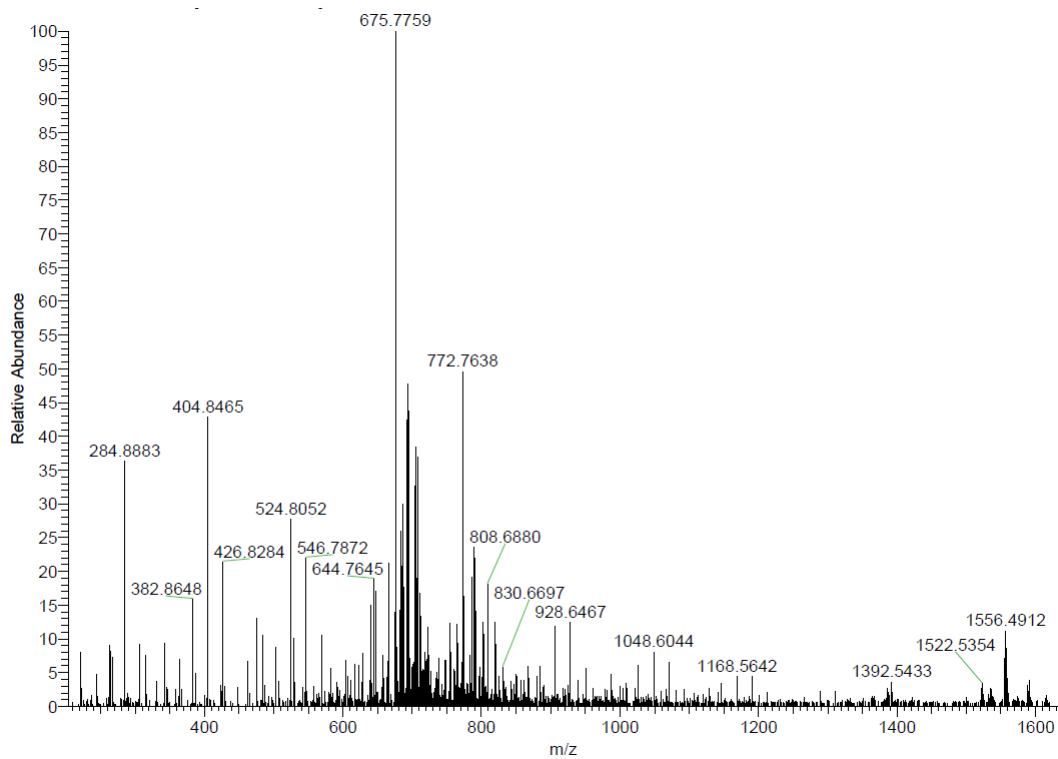

**Figure S10.** ESI(+)-HRMS ( $m/z$ ) for the Cbl-MCPBA adduct after 4 minutes (upper panel) and 30 minutes (lower panel) from mixing. Conditions: 1 mM  $\text{H}_2\text{OCbl}^+$ , 10 mM MCPBA, 50 mM

phosphate pH 7. Samples were prepared at room temperature; vaporizer temperature 50 °C, capillary temperature 275 °C, analyzer temperature 26 °C.

Cbl-MCPBA, bound via O

|        |    |    |   |        |        |        |    |
|--------|----|----|---|--------|--------|--------|----|
| HETATM | 1  | Co | 0 | 0.584  | 0.122  | 0.217  | Co |
| HETATM | 2  | N  | 0 | 1.927  | 1.066  | 1.167  | N  |
| HETATM | 3  | N  | 0 | 1.016  | -1.536 | 1.138  | N  |
| HETATM | 4  | N  | 0 | -0.839 | -0.654 | -0.885 | N  |
| HETATM | 5  | N  | 0 | 0.186  | 1.855  | -0.442 | N  |
| HETATM | 6  | C  | 0 | 2.198  | 2.443  | 0.724  | C  |
| HETATM | 7  | C  | 0 | 2.852  | 3.098  | 1.956  | C  |
| HETATM | 8  | C  | 0 | 3.394  | 1.894  | 2.762  | C  |
| HETATM | 9  | C  | 0 | 2.543  | 0.748  | 2.263  | C  |
| HETATM | 10 | C  | 0 | 2.456  | -0.550 | 2.856  | C  |
| HETATM | 11 | C  | 0 | 1.746  | -1.587 | 2.308  | C  |
| HETATM | 12 | C  | 0 | 1.635  | -2.967 | 2.921  | C  |
| HETATM | 13 | C  | 0 | 0.922  | -3.782 | 1.831  | C  |
| HETATM | 14 | C  | 0 | 0.420  | -2.713 | 0.888  | C  |
| HETATM | 15 | C  | 0 | -0.564 | -2.937 | -0.076 | C  |
| HETATM | 16 | C  | 0 | -1.173 | -1.957 | -0.859 | C  |
| HETATM | 17 | C  | 0 | -2.345 | -2.240 | -1.768 | C  |
| HETATM | 18 | C  | 0 | -2.543 | -0.914 | -2.516 | C  |
| HETATM | 19 | C  | 0 | -1.618 | 0.038  | -1.787 | C  |
| HETATM | 20 | C  | 0 | -1.547 | 1.388  | -2.032 | C  |
| HETATM | 21 | C  | 0 | -0.668 | 2.269  | -1.328 | C  |
| HETATM | 22 | C  | 0 | -0.626 | 3.777  | -1.443 | C  |
| HETATM | 23 | C  | 0 | 0.720  | 4.118  | -0.762 | C  |

|        |    |   |   |        |        |        |   |
|--------|----|---|---|--------|--------|--------|---|
| HETATM | 24 | N | 0 | 2.650  | -0.214 | -3.399 | N |
| HETATM | 25 | C | 0 | 3.691  | -0.710 | -2.631 | C |
| HETATM | 26 | C | 0 | 1.616  | 0.065  | -2.570 | C |
| HETATM | 27 | N | 0 | 1.897  | -0.215 | -1.310 | N |
| HETATM | 28 | C | 0 | 3.205  | -0.707 | -1.301 | C |
| HETATM | 29 | C | 0 | 4.034  | -1.153 | -0.260 | C |
| HETATM | 30 | C | 0 | 5.314  | -1.587 | -0.590 | C |
| HETATM | 31 | C | 0 | 5.782  | -1.587 | -1.923 | C |
| HETATM | 32 | C | 0 | 4.976  | -1.147 | -2.969 | C |
| HETATM | 33 | H | 0 | 3.323  | 2.017  | 3.853  | H |
| HETATM | 34 | H | 0 | 0.104  | -4.415 | 2.204  | H |
| HETATM | 35 | H | 0 | -3.582 | -0.556 | -2.504 | H |
| HETATM | 36 | H | 0 | 1.543  | 4.068  | -1.495 | H |
| HETATM | 37 | H | 0 | 6.794  | -1.937 | -2.136 | H |
| HETATM | 38 | H | 0 | 5.978  | -1.939 | 0.203  | H |
| HETATM | 39 | H | 0 | 0.729  | 5.113  | -0.296 | H |
| HETATM | 40 | H | 0 | 2.893  | 2.394  | -0.137 | H |
| HETATM | 41 | H | 0 | 4.452  | 1.676  | 2.531  | H |
| HETATM | 42 | H | 0 | 1.618  | -4.442 | 1.284  | H |
| HETATM | 43 | H | 0 | -2.239 | -0.984 | -3.573 | H |
| HETATM | 44 | H | 0 | 3.692  | -1.159 | 0.770  | H |
| HETATM | 45 | H | 0 | 5.330  | -1.142 | -4.002 | H |
| HETATM | 46 | H | 0 | 0.673  | 0.477  | -2.920 | H |
| HETATM | 47 | H | 0 | 2.653  | -0.077 | -4.403 | H |
| HETATM | 48 | H | 0 | 2.987  | -0.724 | 3.792  | H |

|        |    |    |   |        |        |        |    |
|--------|----|----|---|--------|--------|--------|----|
| HETATM | 49 | H  | 0 | -2.225 | 1.817  | -2.770 | H  |
| HETATM | 50 | H  | 0 | -2.151 | -3.103 | -2.422 | H  |
| HETATM | 51 | H  | 0 | -3.220 | -2.493 | -1.147 | H  |
| HETATM | 52 | H  | 0 | -0.952 | -3.952 | -0.163 | H  |
| HETATM | 53 | H  | 0 | 2.617  | -3.367 | 3.212  | H  |
| HETATM | 54 | H  | 0 | 1.026  | -2.901 | 3.838  | H  |
| HETATM | 55 | H  | 0 | 3.631  | 3.826  | 1.692  | H  |
| HETATM | 56 | H  | 0 | 2.083  | 3.622  | 2.543  | H  |
| HETATM | 57 | H  | 0 | -0.724 | 4.131  | -2.479 | H  |
| HETATM | 58 | H  | 0 | -1.480 | 4.170  | -0.864 | H  |
| HETATM | 59 | C  | 0 | -2.397 | 1.684  | 1.318  | C  |
| HETATM | 60 | O  | 0 | -2.719 | 2.800  | 0.984  | O  |
| HETATM | 61 | C  | 0 | -3.280 | 0.487  | 1.155  | C  |
| HETATM | 62 | C  | 0 | -4.242 | 0.555  | 0.138  | C  |
| HETATM | 63 | C  | 0 | -3.224 | -0.635 | 1.997  | C  |
| HETATM | 64 | C  | 0 | -5.106 | -0.521 | -0.063 | C  |
| HETATM | 65 | H  | 0 | -4.295 | 1.440  | -0.495 | H  |
| HETATM | 66 | C  | 0 | -4.124 | -1.685 | 1.807  | C  |
| HETATM | 67 | H  | 0 | -2.478 | -0.679 | 2.788  | H  |
| HETATM | 68 | C  | 0 | -5.063 | -1.644 | 0.771  | C  |
| HETATM | 69 | H  | 0 | -4.096 | -2.552 | 2.471  | H  |
| HETATM | 70 | H  | 0 | -5.758 | -2.469 | 0.606  | H  |
| HETATM | 71 | Cl | 0 | -6.231 | -0.478 | -1.402 | Cl |
| HETATM | 72 | O  | 0 | -0.588 | 0.238  | 1.699  | O  |
| HETATM | 73 | O  | 0 | -1.173 | 1.528  | 1.889  | O  |

HETATM 74 C 0 0.846 2.976 0.250 C

HETATM 75 H 0 0.237 3.192 1.144 H

END

CONNECT 1 2 3 4 5

CONNECT 1 72

CONNECT 2 1 6 9

CONNECT 3 1 11 14

CONNECT 4 1 16 19

CONNECT 5 1 21 74

CONNECT 6 2 7 40 74

CONNECT 7 6 8 55 56

CONNECT 8 7 9 33 41

CONNECT 9 2 8 10

CONNECT 10 9 11 48

CONNECT 11 3 10 12

CONNECT 12 11 13 53 54

CONNECT 13 12 14 34 42

CONNECT 14 3 13 15

CONNECT 15 14 16 52

CONNECT 16 15 4 17

CONNECT 17 16 18 50 51

CONNECT 18 17 19 35 43

CONNECT 19 18 4 20

CONNECT 20 19 21 49

CONNECT 21 20 5 22

CONECT 22 21 23 57 58

CONECT 23 22 36 39 74

CONECT 24 25 26 47

CONECT 25 24 28 32

CONECT 26 24 27 46

CONECT 27 26 28

CONECT 28 27 25 29

CONECT 29 28 30 44

CONECT 30 29 31 38

CONECT 31 30 32 37

CONECT 32 31 25 45

CONECT 33 8

CONECT 34 13

CONECT 35 18

CONECT 36 23

CONECT 37 31

CONECT 38 30

CONECT 39 23

CONECT 40 6

CONECT 41 8

CONECT 42 13

CONECT 43 18

CONECT 44 29

CONECT 45 32

CONECT 46 26



CONNECT 47 24  
CONNECT 48 10  
CONNECT 49 20  
CONNECT 50 17  
CONNECT 51 17  
CONNECT 52 15  
CONNECT 53 12  
CONNECT 54 12  
CONNECT 55 7  
CONNECT 56 7  
CONNECT 57 22  
CONNECT 58 22  
CONNECT 59 60 61 73  
CONNECT 60 59  
CONNECT 61 59 62 63  
CONNECT 62 61 64 65  
CONNECT 63 61 66 67  
CONNECT 64 62 68 71  
CONNECT 65 62  
CONNECT 66 63 68 69  
CONNECT 67 63  
CONNECT 68 66 64 70  
CONNECT 69 66  
CONNECT 70 68  
CONNECT 71 64

CONECT 72 1

CONECT 73 59

CONECT 74 5 6 23 75

CONECT 75 74

Cbl-tBuOOH

|        |    |    |   |        |        |        |    |
|--------|----|----|---|--------|--------|--------|----|
| HETATM | 1  | Co | 0 | 0.114  | 0.305  | 0.058  | Co |
| HETATM | 2  | N  | 0 | 0.184  | -1.061 | -1.261 | N  |
| HETATM | 3  | N  | 0 | -0.083 | -1.013 | 1.478  | N  |
| HETATM | 4  | N  | 0 | 0.032  | 1.851  | 1.254  | N  |
| HETATM | 5  | N  | 0 | 0.505  | 1.421  | -1.420 | N  |
| HETATM | 6  | C  | 0 | 0.242  | -0.609 | -2.661 | C  |
| HETATM | 7  | C  | 0 | 0.899  | -1.790 | -3.401 | C  |
| HETATM | 8  | C  | 0 | 0.638  | -2.993 | -2.466 | C  |
| HETATM | 9  | C  | 0 | 0.416  | -2.328 | -1.127 | C  |
| HETATM | 10 | C  | 0 | 0.423  | -2.993 | 0.138  | C  |
| HETATM | 11 | C  | 0 | 0.182  | -2.358 | 1.328  | C  |
| HETATM | 12 | C  | 0 | 0.184  | -3.037 | 2.679  | C  |
| HETATM | 13 | C  | 0 | -0.373 | -1.954 | 3.617  | C  |
| HETATM | 14 | C  | 0 | -0.306 | -0.708 | 2.765  | C  |
| HETATM | 15 | C  | 0 | -0.439 | 0.583  | 3.280  | C  |
| HETATM | 16 | C  | 0 | -0.230 | 1.763  | 2.569  | C  |
| HETATM | 17 | C  | 0 | -0.278 | 3.132  | 3.211  | C  |
| HETATM | 18 | C  | 0 | 0.178  | 4.068  | 2.081  | C  |
| HETATM | 19 | C  | 0 | 0.244  | 3.157  | 0.872  | C  |
| HETATM | 20 | C  | 0 | 0.478  | 3.593  | -0.410 | C  |
| HETATM | 21 | C  | 0 | 0.654  | 2.705  | -1.518 | C  |
| HETATM | 22 | C  | 0 | 1.111  | 3.085  | -2.913 | C  |

|        |    |   |   |        |        |        |   |
|--------|----|---|---|--------|--------|--------|---|
| HETATM | 23 | C | 0 | 0.861  | 1.781  | -3.709 | C |
| HETATM | 24 | C | 0 | 0.996  | 0.719  | -2.612 | C |
| HETATM | 25 | N | 0 | -3.812 | 1.549  | -0.669 | N |
| HETATM | 26 | C | 0 | -4.154 | 0.211  | -0.547 | C |
| HETATM | 27 | C | 0 | -2.473 | 1.654  | -0.483 | C |
| HETATM | 28 | N | 0 | -1.908 | 0.485  | -0.244 | N |
| HETATM | 29 | C | 0 | -2.935 | -0.460 | -0.280 | C |
| HETATM | 30 | C | 0 | -2.933 | -1.853 | -0.110 | C |
| HETATM | 31 | C | 0 | -4.151 | -2.520 | -0.208 | C |
| HETATM | 32 | C | 0 | -5.357 | -1.835 | -0.470 | C |
| HETATM | 33 | C | 0 | -5.380 | -0.454 | -0.645 | C |
| HETATM | 34 | H | 0 | 1.466  | -3.716 | -2.430 | H |
| HETATM | 35 | H | 0 | 0.187  | -1.840 | 4.555  | H |
| HETATM | 36 | H | 0 | 1.180  | 4.486  | 2.271  | H |
| HETATM | 37 | H | 0 | -0.164 | 1.774  | -4.114 | H |
| HETATM | 38 | H | 0 | 2.057  | 0.481  | -2.414 | H |
| HETATM | 39 | H | 0 | -6.290 | -2.399 | -0.538 | H |
| HETATM | 40 | H | 0 | -4.175 | -3.605 | -0.081 | H |
| HETATM | 41 | H | 0 | 1.562  | 1.640  | -4.542 | H |
| HETATM | 42 | H | 0 | -0.793 | -0.426 | -3.007 | H |
| HETATM | 43 | H | 0 | -0.271 | -3.555 | -2.745 | H |
| HETATM | 44 | H | 0 | -1.426 | -2.144 | 3.889  | H |
| HETATM | 45 | H | 0 | -0.496 | 4.920  | 1.911  | H |
| HETATM | 46 | H | 0 | -2.012 | -2.394 | 0.085  | H |
| HETATM | 47 | H | 0 | -6.309 | 0.081  | -0.851 | H |
| HETATM | 48 | H | 0 | -1.941 | 2.601  | -0.532 | H |
| HETATM | 49 | H | 0 | -4.442 | 2.317  | -0.865 | H |

|        |    |   |   |        |        |        |   |
|--------|----|---|---|--------|--------|--------|---|
| HETATM | 50 | H | 0 | 0.633  | -4.063 | 0.155  | H |
| HETATM | 51 | H | 0 | 0.615  | 4.662  | -0.577 | H |
| HETATM | 52 | H | 0 | -1.307 | 3.342  | 3.548  | H |
| HETATM | 53 | H | 0 | 0.361  | 3.174  | 4.106  | H |
| HETATM | 54 | H | 0 | -0.638 | 0.674  | 4.349  | H |
| HETATM | 55 | H | 0 | -0.398 | -3.970 | 2.672  | H |
| HETATM | 56 | H | 0 | 1.221  | -3.300 | 2.943  | H |
| HETATM | 57 | H | 0 | 0.503  | -1.936 | -4.415 | H |
| HETATM | 58 | H | 0 | 1.982  | -1.612 | -3.479 | H |
| HETATM | 59 | H | 0 | 0.586  | 3.968  | -3.305 | H |
| HETATM | 60 | H | 0 | 2.186  | 3.338  | -2.874 | H |
| HETATM | 61 | O | 0 | 1.946  | 0.350  | 0.427  | O |
| HETATM | 62 | O | 0 | 2.710  | -0.560 | -0.385 | O |
| HETATM | 63 | C | 0 | 3.903  | -0.936 | 0.327  | C |
| HETATM | 64 | C | 0 | 3.545  | -1.667 | 1.626  | C |
| HETATM | 65 | H | 0 | 2.912  | -1.022 | 2.251  | H |
| HETATM | 66 | H | 0 | 2.995  | -2.592 | 1.401  | H |
| HETATM | 67 | H | 0 | 4.454  | -1.928 | 2.187  | H |
| HETATM | 68 | C | 0 | 4.753  | 0.308  | 0.606  | C |
| HETATM | 69 | H | 0 | 5.710  | 0.031  | 1.074  | H |
| HETATM | 70 | H | 0 | 4.964  | 0.839  | -0.335 | H |
| HETATM | 71 | H | 0 | 4.215  | 0.993  | 1.275  | H |
| HETATM | 72 | C | 0 | 4.600  | -1.875 | -0.659 | C |
| HETATM | 73 | H | 0 | 4.820  | -1.351 | -1.602 | H |
| HETATM | 74 | H | 0 | 5.547  | -2.241 | -0.235 | H |
| HETATM | 75 | H | 0 | 3.960  | -2.743 | -0.883 | H |

END

CONNECT 1 2 3 4 5  
CONNECT 1 61  
CONNECT 2 1 6 9  
CONNECT 3 1 11 14  
CONNECT 4 1 16 19  
CONNECT 5 1 21 24  
CONNECT 6 2 7 24 42  
CONNECT 7 6 8 57 58  
CONNECT 8 7 9 34 43  
CONNECT 9 8 2 10  
CONNECT 10 9 11 50  
CONNECT 11 10 3 12  
CONNECT 12 11 13 55 56  
CONNECT 13 12 14 35 44  
CONNECT 14 13 3 15  
CONNECT 15 14 16 54  
CONNECT 16 4 15 17  
CONNECT 17 16 18 52 53  
CONNECT 18 17 19 36 45  
CONNECT 19 4 18 20  
CONNECT 20 19 21 51  
CONNECT 21 5 20 22  
CONNECT 22 21 23 59 60  
CONNECT 23 22 24 37 41  
CONNECT 24 6 23 5 38  
CONNECT 25 26 27 49  
CONNECT 26 25 29 33

CONNECT 27 25 28 48  
CONNECT 28 27 29  
CONNECT 29 26 28 30  
CONNECT 30 29 31 46  
CONNECT 31 30 32 40  
CONNECT 32 31 33 39  
CONNECT 33 32 26 47  
CONNECT 34 8  
CONNECT 35 13  
CONNECT 36 18  
CONNECT 37 23  
CONNECT 38 24  
CONNECT 39 32  
CONNECT 40 31  
CONNECT 41 23  
CONNECT 42 6  
CONNECT 43 8  
CONNECT 44 13  
CONNECT 45 18  
CONNECT 46 30  
CONNECT 47 33  
CONNECT 48 27  
CONNECT 49 25  
CONNECT 50 10  
CONNECT 51 20  
CONNECT 52 17  
CONNECT 53 17

CONNECT 54 15  
CONNECT 55 12  
CONNECT 56 12  
CONNECT 57 7  
CONNECT 58 7  
CONNECT 59 22  
CONNECT 60 22  
CONNECT 61 1  
CONNECT 62 63  
CONNECT 63 62 64 68 72  
CONNECT 64 63 65 66 67  
CONNECT 65 64  
CONNECT 66 64  
CONNECT 67 64  
CONNECT 68 63 69 70 71  
CONNECT 69 68  
CONNECT 70 68  
CONNECT 71 68  
CONNECT 72 63 73 74 75  
CONNECT 73 72  
CONNECT 74 72  
CONNECT 75 72
